# Supplementary figures and images for: USP16 drives psoriasis progression by deubiquitinating and stabilizing NLRP3 in keratinocytes
Source: JCI journal article supplement (doi:10.1172/jci.insight.193017), 2026-01-27

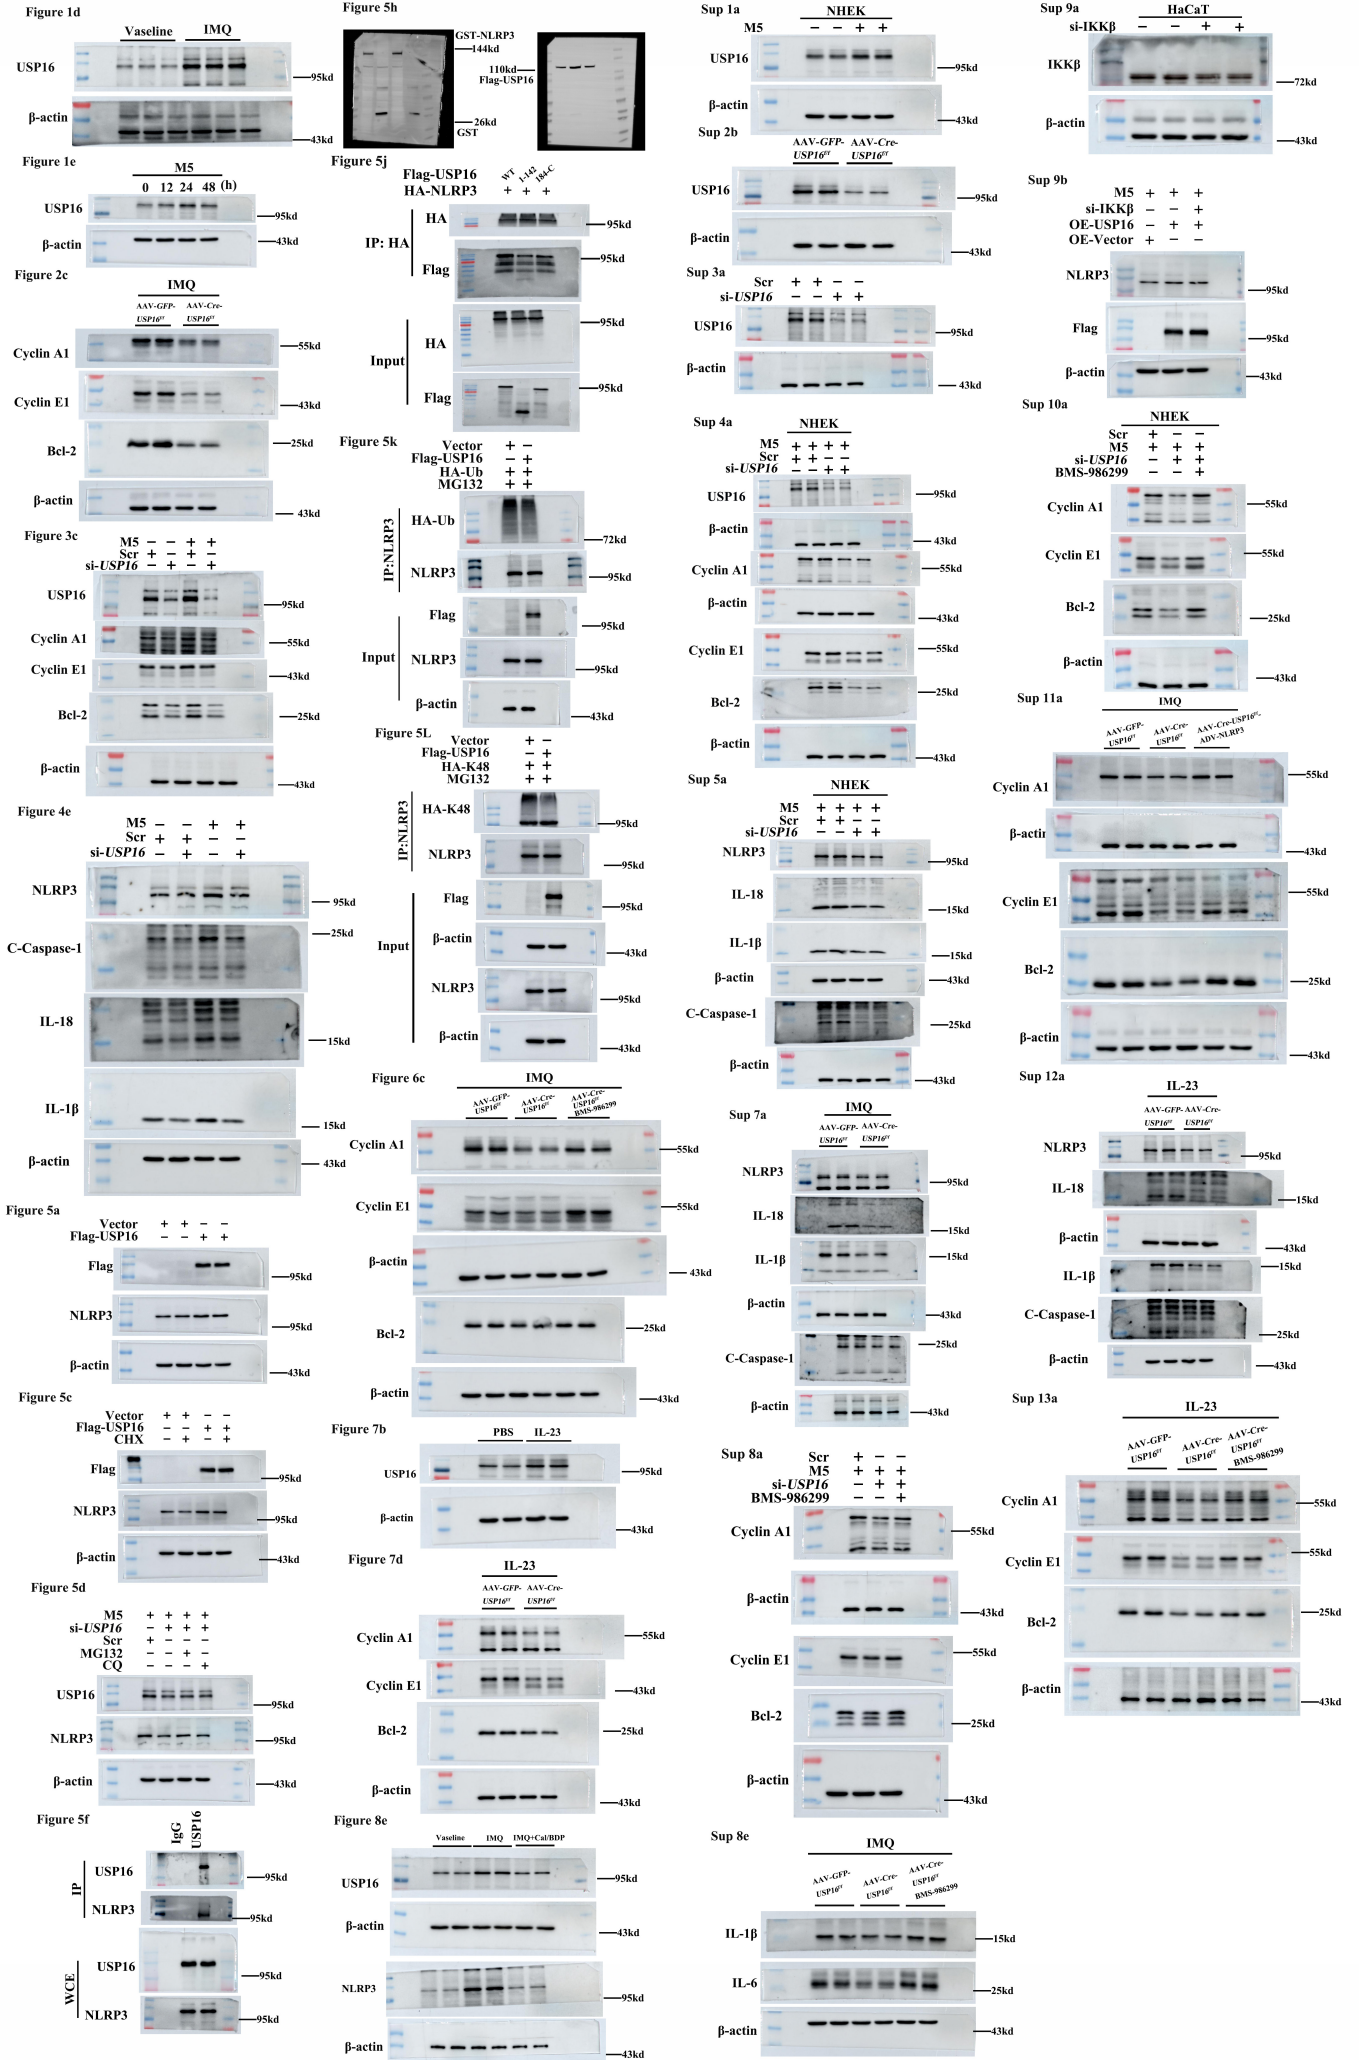

Supplement: sd2 [file 2]
